# Supplementary material
Source: PubMed Central journal article supplement (PMC6825592)
Supplement: NIHMS1539121-supplement-1.pdf [file NIHMS1539121-supplement-1.pdf]

# Supplementary Data

## Title

Single-cell transcriptome analysis reveals gene signatures associated with T-cell persistence following adoptive cell therapy

## Authors

Yong-Chen Lu<sup>1</sup>, Li Jia<sup>1</sup>, Zhili Zheng<sup>1</sup>, Eric Tran<sup>1,2</sup>, Paul F. Robbins<sup>1</sup>, Steven A. Rosenberg<sup>1</sup>

<sup>1</sup>Surgery Branch, National Cancer Institute, National Institutes of Health, Bethesda, MD 20892, USA.

<sup>2</sup>Current address: Earle A. Chiles Research Institute, Providence Cancer Institute, Portland, OR 97213, USA

## Supplementary Table S1

| Persistence_Up | Persistence_Down |
|----------------|------------------|
| KLRB1          | FAM3C            |
| ZNF683         | CXCR4            |
| ITGB1          | GOLIM4           |
| C1orf162       | LAIR1            |
| IL7R           | CD70             |
| LIME1          | HSPA1A           |
| S1PR1          | CD86             |
| TIMP1          | ACP5             |
| C10orf54       | FILIP1L          |
| TBXAS1         | CSF1             |
| KLF2           | CD59             |
| LTB            | CST7             |
| UBXN11         | PLEK             |
| CD40LG         | ITGAX            |
| AMICA1         | SH2D1A           |
| FAM65B         | FABP5            |
| VCL            | PGD              |
| RASA3          | FASLG            |
| SCML4          | EOMES            |
| MYC            | SLC1A5           |
| P2RY8          | AFAP1L2          |
| CDC25B         | NDFIP2           |
| TSPAN32        | SIX1             |
| SYNJ2          | GZMB             |
| RASGRP2        | NCAM1            |
| PXN            | MIR155HG         |
| FAM102A        | GZMH             |
| ADD3           | CDKN2A           |
| TMEM63A        | ACTN1            |
| TSC22D3        | LYST             |
| AQP3           | WNT11            |
| SH3BP5         | CCL3             |
| TMEM123        | LDOC1            |
| GLUL           | CD5              |
| POU2F2         | CD6              |
| MT1F           | GCNT1            |
| C11orf21       | CEBPD            |
| BIN1           | SOX4             |
|                | SKAP2            |
|                | LAIR2            |
|                | GZMK             |

## Supplementary Table S3

### 9.1-NP vs 9.2-P

| Gene Name     | log <sub>2</sub> FC | Known Gene Function                                                                                                                                                                                         |
|---------------|---------------------|-------------------------------------------------------------------------------------------------------------------------------------------------------------------------------------------------------------|
| <b>KLRB1</b>  | 3.432               | A member of the C-type lectin superfamily expressed by NK cells. May be involved in the regulation of NK cell function.                                                                                     |
| <b>ZNF683</b> | 2.712               | A transcription factor that mediates a transcriptional program in tissue-resident memory T cells, natural killer cells and natural killer T cells                                                           |
| <b>ITGB1</b>  | 1.973               | A member of integrin family involved in cell adhesion and recognition in a variety of processes including embryogenesis, hemostasis, tissue repair, immune response and metastatic diffusion of tumor cells |
| C1orf162      | 1.641               | Unknown function                                                                                                                                                                                            |
| <b>IL7R</b>   | 1.307               | A receptor for interleukin 7 (IL-7). Essential for the normal development and homeostasis of T cells                                                                                                        |
| <b>LIME1</b>  | 1.257               | A transmembrane adaptor protein that links the T and B-cell receptor stimulation to downstream signaling pathways via its association with the Src family kinases Lck and Lyn, respectively                 |
| <b>S1PR1</b>  | 1.224               | A receptor for the lysosphingolipid sphingosine-1-phosphate (S1P). Required for the egress of T cells from the thymus or lymphoid organs                                                                    |
| TIMP1         | 1.218               | A member of the natural inhibitors of the matrix metalloproteinases (MMPs)                                                                                                                                  |
| C10orf54      | 1.192               | V-domain Ig suppressor of T cell activation (VISTA), which is an immune checkpoint molecule                                                                                                                 |
| TBXAS1        | 1.171               | Thromboxane synthase, a cytochrome P450 enzyme, catalyzes the conversion of the prostaglandin endoperoxide into thromboxane A <sub>2</sub> , a potent vasoconstrictor and inducer of platelet aggregation   |
| <b>GZMK</b>   | -3.475              | A member of related serine proteases from the cytoplasmic granules of cytotoxic lymphocytes                                                                                                                 |
| <b>LAIR2</b>  | -2.411              | A member of the immunoglobulin superfamily. A soluble receptor that may play roles in both inhibition of collagen-induced platelet aggregation and vessel formation during placental implantation           |
| <b>SKAP2</b>  | -1.949              | A substrate of Src family kinases. May play a role in regulating proper activation of the immune system                                                                                                     |
| CCDC50        | -1.948              | A soluble, cytoplasmic, tyrosine-phosphorylated protein with multiple ubiquitin-interacting domains. Mutations in this gene cause nonsyndromic, postlingual, progressive sensorineural DFNA44 hearing loss  |
| <b>SOX4</b>   | -1.890              | A member of the SOX (SRY-related HMG-box) family of transcription factors involved in the regulation of embryonic development and in the determination of the cell fate. Required for pro-B-cell survival   |
| <b>CEBPD</b>  | -1.787              | A bZIP transcription factor. Important in the regulation of genes involved in inflammatory responses and the activation/differentiation of macrophages                                                      |
| GCNT1         | -1.741              | A member of the beta-1,6-N-acetylglucosaminyltransferase gene family. Essential to the formation of Gal beta 1-3(GlcNAc beta 1-6)GalNAc structures and the core 2 O-glycan branch                           |
| CD6           | -1.705              | Cell adhesion molecule that may mediate cell-cell contacts and regulate T-cell responses                                                                                                                    |
| CD5           | -1.696              | A member of the scavenger receptor cysteine-rich (SRCR) superfamily. May negatively regulate TCR signaling                                                                                                  |
| TPRG1         | -1.547              | Tumor Protein P63 Regulated 1. Unknown function                                                                                                                                                             |

## Supplementary Table S4

### 9.1-NP vs 10-P

| Gene Name     | log <sub>2</sub> FC | Known Gene Function                                                                                                                                                                                             |
|---------------|---------------------|-----------------------------------------------------------------------------------------------------------------------------------------------------------------------------------------------------------------|
| <b>ZNF683</b> | 3.967               | A transcription factor that mediates a transcriptional program in tissue-resident memory T cells, natural killer cells and natural killer T cells                                                               |
| UBXN11        | 1.837               | UBX Domain Protein 11. May serve a bidirectional role in the promotion and inhibition of the Rnd subfamily members of Rho GTPases through upstream signaling pathways.                                          |
| <b>ITGB1</b>  | 1.832               | A member of integrin family involved in cell adhesion and recognition in a variety of processes including embryogenesis, hemostasis, tissue repair, immune response and metastatic diffusion of tumor cells     |
| ITM2C         | 1.818               | Negative regulator of amyloid-beta peptide production. May inhibit the processing of APP by blocking its access to alpha- and beta-secretase                                                                    |
| <b>LIME1</b>  | 1.784               | A transmembrane adaptor protein that links the T and B-cell receptor stimulation to downstream signaling pathways via its association with the Src family kinases Lck and Lyn, respectively                     |
| <b>KLRB1</b>  | 1.688               | A member of the C-type lectin superfamily expressed by NK cells. May be involved in the regulation of NK cell function.                                                                                         |
| KLF2          | 1.680               | A member of Kruppel family of transcription factors. An essential regulator for T-cell migration                                                                                                                |
| <b>S1PR1</b>  | 1.596               | A receptor for the lysosphingolipid sphingosine-1-phosphate (S1P). Required for the egress of T cells from the thymus or lymphoid organs                                                                        |
| RASA3         | 1.506               | A protein that binds inositol 1,3,4,5-tetrakisphosphate and stimulates the GTPase activity of Ras p21. Functioned as a negative regulator of the Ras signaling pathway                                          |
| <b>IL7R</b>   | 1.505               | A receptor for interleukin 7 (IL-7). Essential for the normal development and homeostasis of T cells                                                                                                            |
| <b>GZMK</b>   | -3.554              | A member of related serine proteases from the cytoplasmic granules of cytotoxic lymphocytes                                                                                                                     |
| CCL3          | -2.572              | Also known as macrophage inflammatory protein 1 alpha. Playing a role in inflammatory responses through binding to the receptors CCR1, CCR4 and CCR5                                                            |
| <b>CEBPD</b>  | -2.484              | A bZIP transcription factor. Important in the regulation of genes involved in inflammatory responses and the activation/differentiation of macrophages                                                          |
| <b>LAIR2</b>  | -2.184              | A member of the immunoglobulin superfamily. A soluble receptor that may play roles in both inhibition of collagen-induced platelet aggregation and vessel formation during placental implantation               |
| WNT11         | -2.148              | A member of the WNT gene family which have been implicated in oncogenesis and in several developmental processes, including regulation of cell fate and patterning during embryogenesis                         |
| CPA5          | -1.873              | A member of the A/B subfamily of carboxypeptidases, which have functions ranging from digestion of food to selective biosynthesis of neuroendocrine peptides                                                    |
| <b>SKAP2</b>  | -1.853              | A substrate of Src family kinases. May play a role in regulating proper activation of the immune system                                                                                                         |
| <b>SOX4</b>   | -1.739              | A member of the SOX (SRY-related HMG-box) family of transcription factors involved in the regulation of embryonic development and in the determination of the cell fate. Required for pro-B-cell survival       |
| LYST          | -1.609              | A protein that regulates intracellular protein trafficking in endosomes. May be involved in pigmentation                                                                                                        |
| EOMES         | -1.575              | A transcription factor which is crucial for embryonic development of mesoderm and the central nervous system in vertebrates. May also be necessary for the differentiation of effector CD8 <sup>+</sup> T cells |

## Supplementary Table S6

| TIL ID | Targeted mutation | % in infused TILs | % in PBL at ~1 month | Ratio (% in 1m PBL / % in TIL) |
|--------|-------------------|-------------------|----------------------|--------------------------------|
| 4007   | SKIV2L            | 64.4              | 0.93                 | <b>0.014</b>                   |
| 4069   | ZFYVE27           | 91.9              | N.D.                 | <b>0</b>                       |
| 4071   | QSOX2             | 32.3              | 0.0014               | <b>0.000043</b>                |
| 4081   | ALDOC             | 72.1              | 1.40                 | <b>0.019</b>                   |
| 4095   | KRAS              | 49.5 / 19.1 / 6.9 | N.D. / 5.3 / 2.2     | <b>0 / 0.28 / 0.32</b>         |

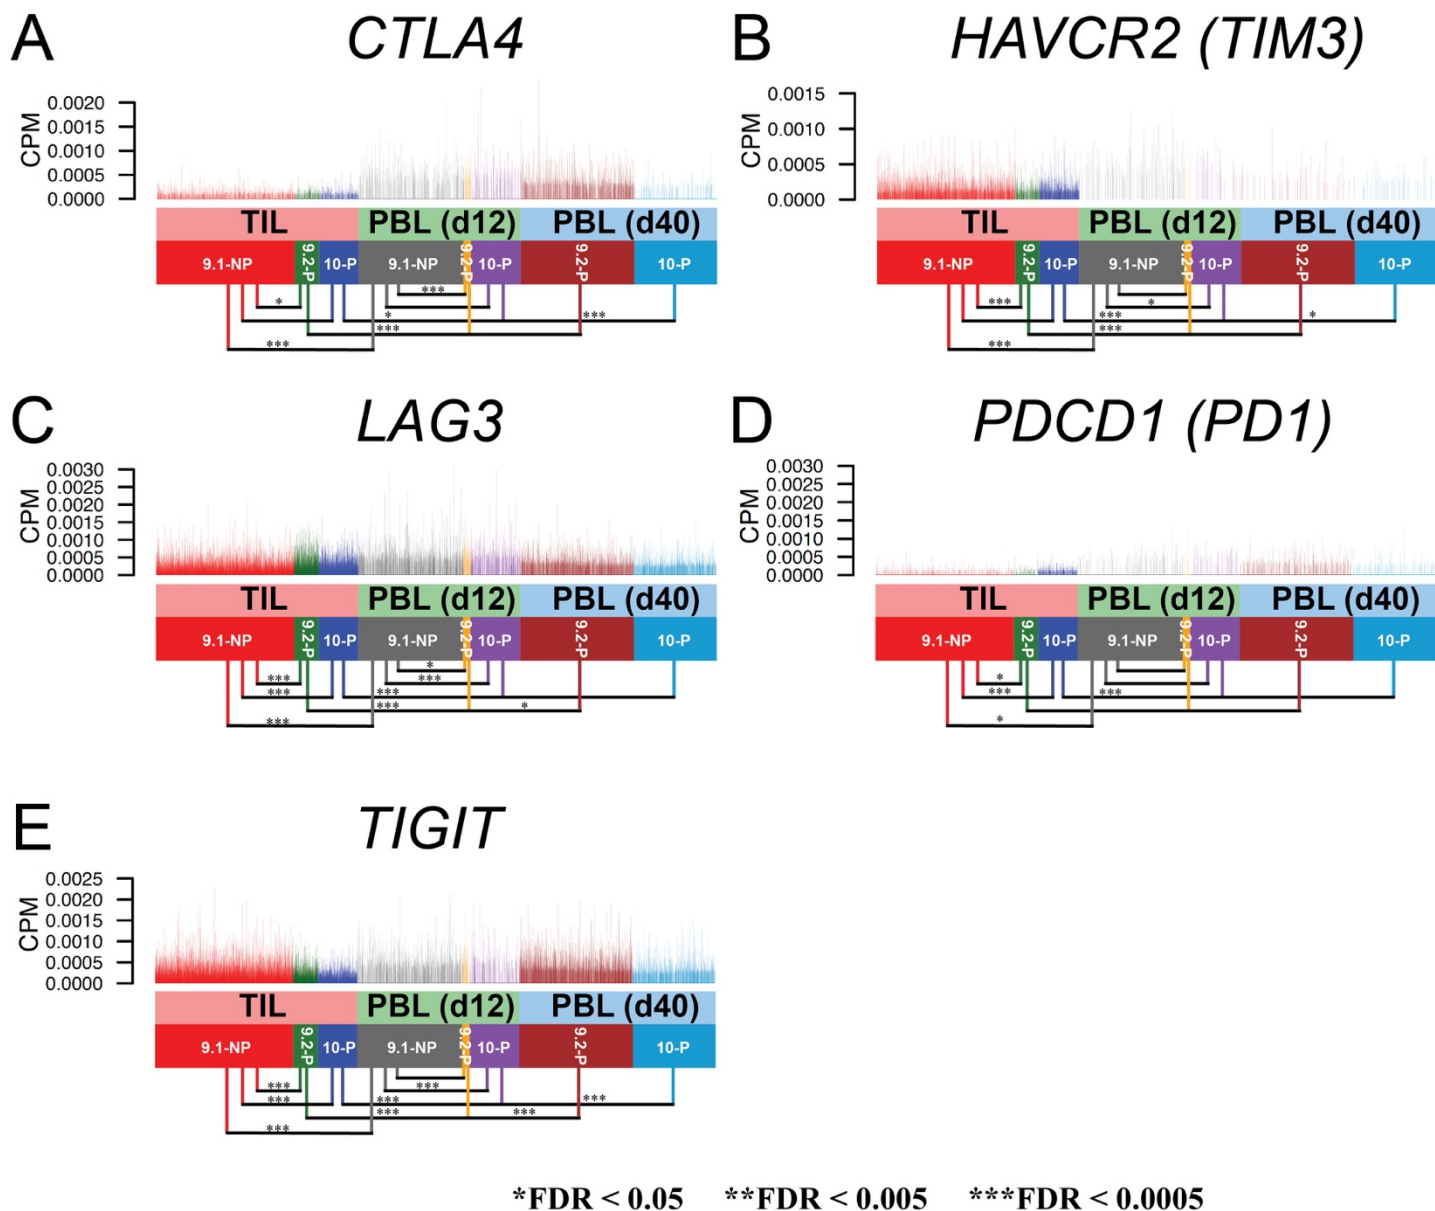

**Supplementary Figure S1:** The expression of negative co-stimulatory molecules. The single-cell gene expression profiles of clonotypes 9.1-NP, 9.2-P and 10-P were obtained from the same experiments shown in Figure 1 for TIL4095 and Figure 4 for PBL samples. Each vertical line represents a single cell. CPM: counts per million.

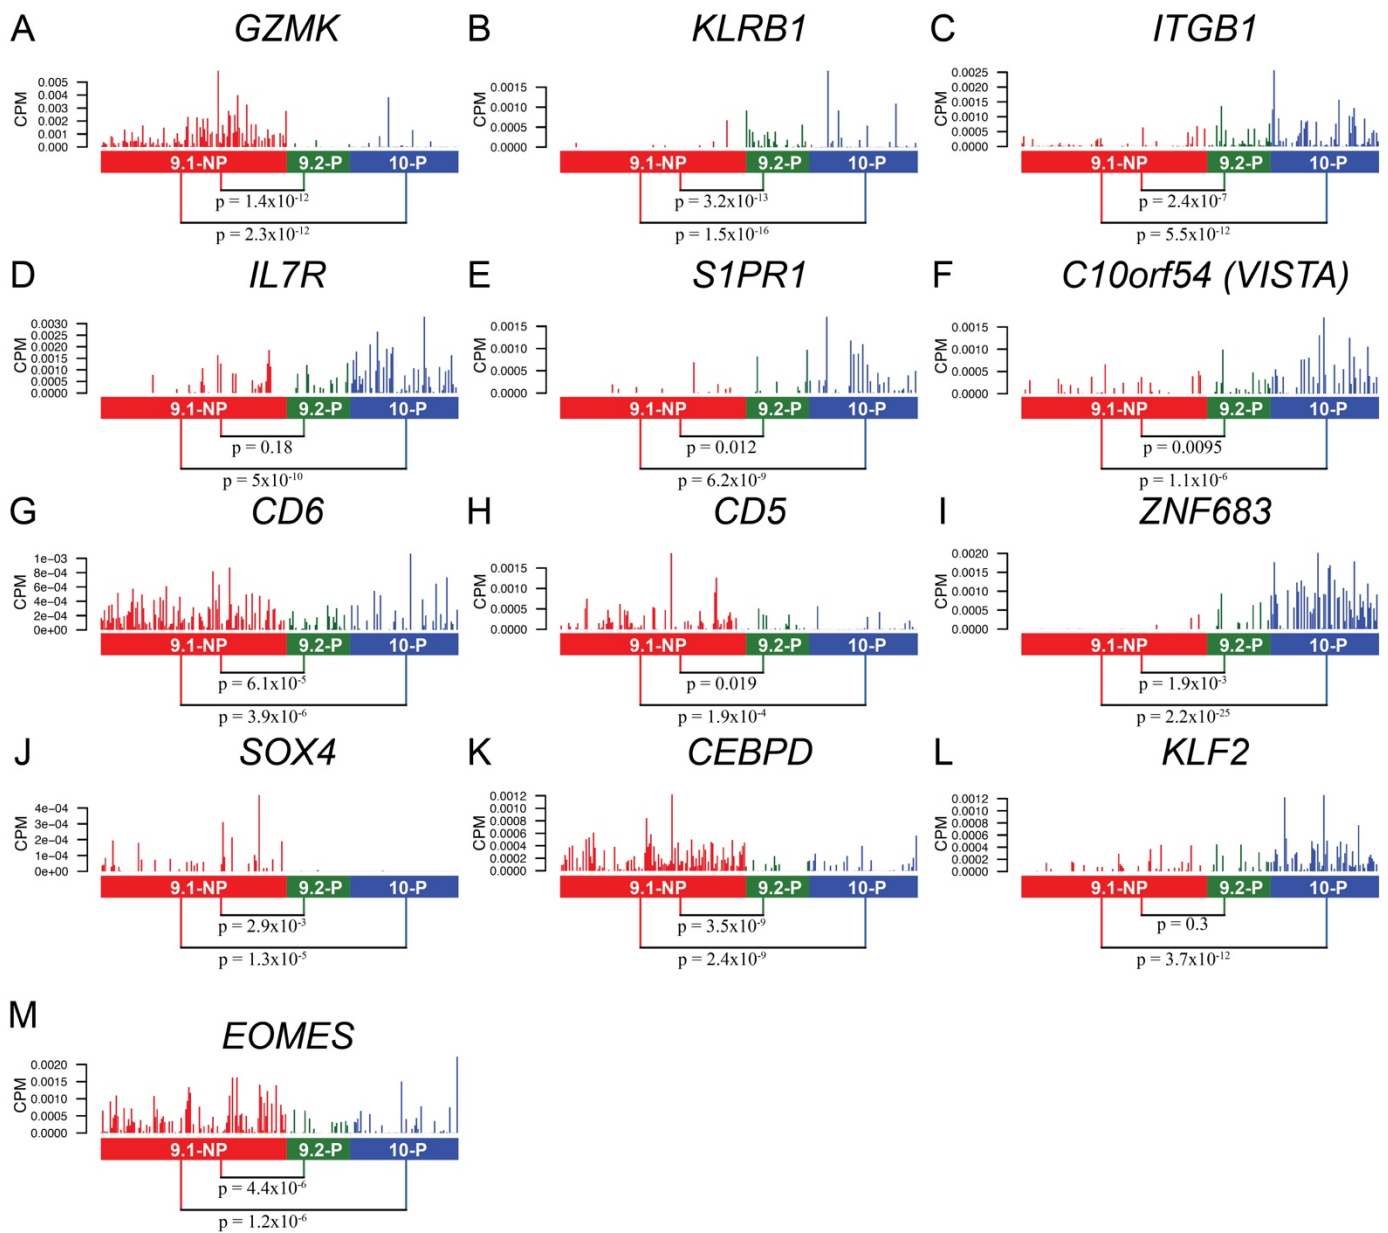

**Supplementary Figure S2:** The gene expression profiles of single cells following Fluidigm C1 single-cell transcriptome analysis. TIL4095 T cells were enriched by KRAS-9mer or KRAS-10mer tetramer and then subjected to a Fluidigm C1 system for the single-cell transcriptome analysis, as describe in the Materials and Methods section. The gene expression of 9.1-NP, 9.2-P and 10-P single cells is shown. Each vertical line represents a single cell. The p-values were calculated by the Wilcoxon signed-rank test. CPM: counts per million.

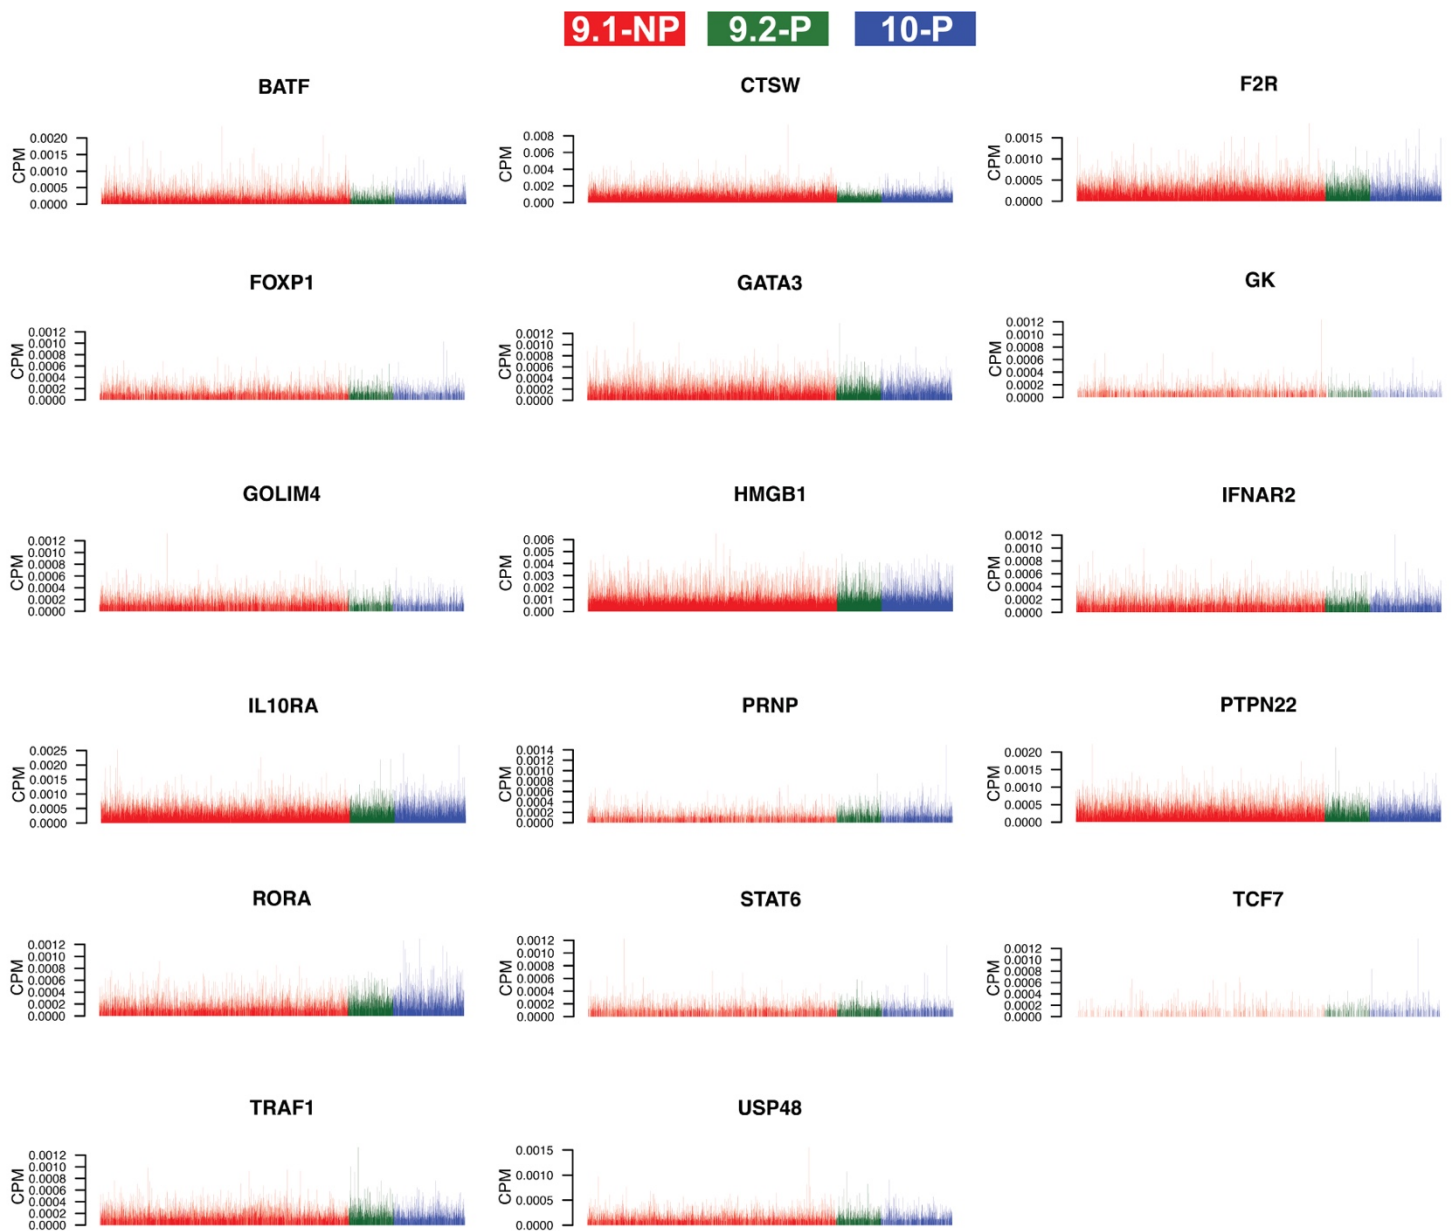

**Supplementary Figure S3:** The gene expression profiles of selected memory T cell-related genes. The single-cell gene expression profiles of clonotypes 9.1-NP, 9.2-P and 10-P were obtained from the same experiment shown in Figure 1. The lists of memory T cell-related genes were obtained from Goldrath immune memory gene set and GO T-cell differentiation gene set. Only genes with detectable expression are shown. Significant differences ( $FDR < 0.05$ ) were observed in CTSW, F2R, FOXP1, GATA3, GOLIM4, HMGB1, PRNP, PTPN22 and RORA genes (table S1). Each vertical line represents a single cell. CPM: counts per million.
